# Supplementary material for: Humic-like substances from urban waste as auxiliaries for photo-Fenton treatment: a fluorescence EEM-PARAFAC study
Source: Royal Society of Chemistry journal article supplement (doi:10.1039/c6pp00236f), 2016-09-13
Supplement: c6pp00236f1.pdf [file c6pp00236f1.pdf]

## SUPPLEMENTARY INFORMATION

### Humic-like Substances from Urban Waste as Auxiliaries for Photo-Fenton Treatment: a Fluorescence EEM-PARAFAC Study

S. García Ballesteros, M. Costante, R. Vicente, M. Mora, A. M. Amat, A. Arques, L. Carlos\* and F.S. García Einschlag

**Table S1.** Fluorescence characteristics of EEMs spectroscopy components from PARAFAC model.

| Component | pH 3      | pH 5      | pH7       | Description                                                     |
|-----------|-----------|-----------|-----------|-----------------------------------------------------------------|
|           | (Ex /Em)  | (Ex /Em)  | (Ex /Em)  |                                                                 |
| C1        | 315 / 405 | 310 / 410 | 320 / 430 | humic-like fraction of organic matter from microbial production |
| C2        | 340 / 480 | 355 / 495 | 365 / 505 | humic-like substances from terrestrial organic matter           |
| C3        | 285 / 345 | 285 / 350 | 285 / 385 | Amino acid (tryptophan-like)                                    |

#### Complexation Modeling

The binding parameters between fluorescent components derived from PARAFAC and Fe(III) were determined using a modification of the complexation model reported by Ryan and Weber.<sup>3</sup> This model has been extensively used for describing metal ion binding to humic substances.<sup>4,5</sup> PARAFAC decomposes the complex mixture of HLS fluorophores into independent fluorescent components; hence the application of a binding model to the individual PARAFAC components is more descriptive than the application of the Ryan and Weber equation to a single condition of excitation/emission wavelength. PARAFAC analysis of EEMs obtained for HLS in the presence of different Fe(III) concentrations

shows that, within the experimental domain analyzed, the relative emission profiles of the most significant components can be described by assuming two contributions to the fluorescence

$$\frac{I}{I_0} = \frac{I_q}{I_0} (1 - f) + \frac{I_{nq}}{I_0} \quad (1)$$

where  $I_0$  is the intensity of HLS solutions without added Fe(III),  $I$  is the intensity recorded at a given metal concentration,  $I_q$  is the fluorescence intensity quenchable by ferric ions,  $f$  is the fraction of  $I_q$  quenched at a given metal concentration, and  $I_{nq}$  is the fluorescence intensity that is unaffected by the presence of iron.

In order to obtain the dependence of  $f$  with iron concentration, we assumed that the quenchable fluorescence is due to the formation of 1:1 complexes between ferric ions and fluorescent-active binding sites on HLS.

$$K = \frac{[MH]}{[M][H]} \quad (2)$$

where  $K$  denotes the conditional stability constant at a given pH and ionic strength,  $[MH]$  is the molar concentration of complexed active sites,  $[M]$  is the concentration of ferric cations not bounded to HLS fluorescent-active sites, and  $[H]$  is the concentration of quencheable fluorescent-active sites on HLS not bounded to ferric cations. Thus  $f$  can be written as:

$$f = \frac{[MH]}{[H]_0} \quad (3)$$

where  $H_0$  is the total concentration of fluorescence-active sites of HLS. Taking into account the mass balance equations for both the metal and the fluorescent-active sites on HLS that are accessible to iron cations, it can be easily shown that the value of  $f$  is given by

$$f = \frac{(K(H_0 + M_0) + 1) - \sqrt{(K(H_0 + M_0) + 1)^2 - 4K^2 H_0 M_0}}{2KH_0} \quad (4)$$

where  $M_0$  is the metal concentration. Combining eq. 1 and eq. 4 is possible to derive the following equation:

$$\frac{I}{I_0} = 1 + \left( \frac{I_{nq}}{I_0} - 1 \right) \frac{(KH_0 + KM_0 + 1) - \sqrt{(KH_0 + KM_0 + 1)^2 - 4K^2H_0M_0}}{2KH_0} \quad (5)$$

Nonlinear fitting was applied on the fluorescence data recorded at different Fe(III) concentration to estimate K,  $H_0$  and  $I_{nq}$  values.

### References:

1. T. Ohno, Fluorescence inner-filtering correction for determining the humification index of dissolved organic matter, *Environ. Sci. Technol.*, 2002, **36**, 742-746.
2. M. Bahram, R. Bro, C. Stedmon and A. Afkhami, Handling of Rayleigh and Raman scatter for PARAFAC modeling of fluorescence data using interpolation, *Journal of Chemometrics*, 2006, **20**, 99-105.
3. D. K. Ryan and J. H. Weber, Fluorescence quenching titration for determination of complexing capacities and stability constants of fulvic acid, *Anal. Chem.*, 1982, **54**, 986-990.
4. C. Plaza, G. Brunetti, N. Senesi and A. Polo, Molecular and quantitative analysis of metal ion binding to humic acids from sewage sludge and sludge-amended soils by fluorescence spectroscopy, *Environ. Sci. Technol.*, 2006, **40**, 917-923.
5. T. Ohno, A. Amirbahman and R. Bro, Parallel factor analysis of excitation-emission matrix fluorescence spectra of water soluble soil organic matter as basis for the determination of conditional metal binding parameters, *Environ. Sci. Technol.*, 2008, **42**, 186-192.
